# Supplementary material for: Qualitative insights into reasons for missed opportunities for vaccination in Kenyan health facilities
Source: PubMed Central journal article supplement (PMC7105087; doi:10.1371/journal.pone.0230783), 2020-03-30
Supplement: pone.0230783.s002.pdf [file pone.0230783.s002.pdf]

## **FGD Guide for Health Workers**

2. Where do children in this community go to get vaccination services?
  - a. Probe for their levels of satisfaction with the vaccination services children receive from the private and/or public clinics/hospitals (e.g. How do you feel about the vaccination services you receive from these locations?)
  
  - b. Probe for reasons for their satisfaction or dissatisfaction (e.g. Why?)
  
3. How can these services be improved?

## **Vaccine Compliance**

4. In Kenya, as you are familiar with, the national programme sets a vaccination schedule. Do children often receive their vaccines following this schedule?

## **FGD Guide for Health Workers**

5. Many children DO NOT receive all their vaccines on time, as listed on the national schedule. What are some of the reasons children DO NOT receive all their recommended vaccines on time when they visit the clinic/hospital?
  - a. Probe: What are some of the reasons children DO receive all their recommended vaccines on time?
  
6. What will be your suggestions for helping children to catch up with their vaccinations, if needed?

## **Missed Opportunities**

7. In some clinics, the health workers DO NOT always give children all the vaccines they need. What strategies, if any, can the ministry employ to improve on the number of children that receive their recommended vaccinations on time?
  - a. Probe: Strategies other critical entities can employ?
