# Supplementary material for: Qualitative insights into reasons for missed opportunities for vaccination in Kenyan health facilities
Source: PubMed Central journal article supplement (PMC7105087; doi:10.1371/journal.pone.0230783), 2020-03-30
Supplement: pone.0230783.s004.pdf [file pone.0230783.s004.pdf]

## **KII Guide**

### Missed Opportunities

7. In some clinics, the health workers DO NOT always give children all the vaccines they need. What strategies, if any, can the ministry employ to improve on the number of children that receive their recommended vaccinations on time?

a. Probe: Strategies other critical entities can employ?

8. Some children receive some, but not all the vaccines they need. How can we ensure that any child who comes to the clinic/hospital is up-to-date with their vaccination?

9. In some cases, children who visit health facilities, for different reasons, still do not get all the needed vaccines. (They may be visiting for immunization, nutrition, treatment of other ailments, or accompanying an adult to the clinic/hospital). What are the possible barriers to implementing any of these strategies to reduce missed opportunities?

a. Probe: Possible solutions to any barriers that have been mentioned

### **Closing Questions**

1. Are there additional recommendations that you would like to share at this time?

2. Does anyone else have anything they would like to add?
